# Supplementary material for: Mitochondrial Complex I Is a Global Regulator of Secondary Metabolism, Virulence and Azole Sensitivity in Fungi
Source: PLoS One. 2016 Jul 20;11(7):e0158724. doi: 10.1371/journal.pone.0158724 (PMC4954691; doi:10.1371/journal.pone.0158724)

**S3 Fig. Analysis of changes in gene expression for secondary metabolite gene clusters in *A. fumigatus*.**

**S3 Fig. Changes in gene expression of secondary metabolite gene clusters comparing the effects of deletion of the 29.9KD gene and addition of itraconazole.** A. Log2 fold change in expression of genes in secondary metabolite clusters in the Δ29.9 KD strain relative to the parental strain in the presence of itraconazole. B. Log2 fold change in expression of genes in secondary metabolite clusters in the Δ29.9 KD strain relative to the parental strain with no itraconazole. C. Log2 fold change in expression of genes in secondary metabolite clusters in the parental strain in the presence of itraconazole relative to expression in the absence of itracona


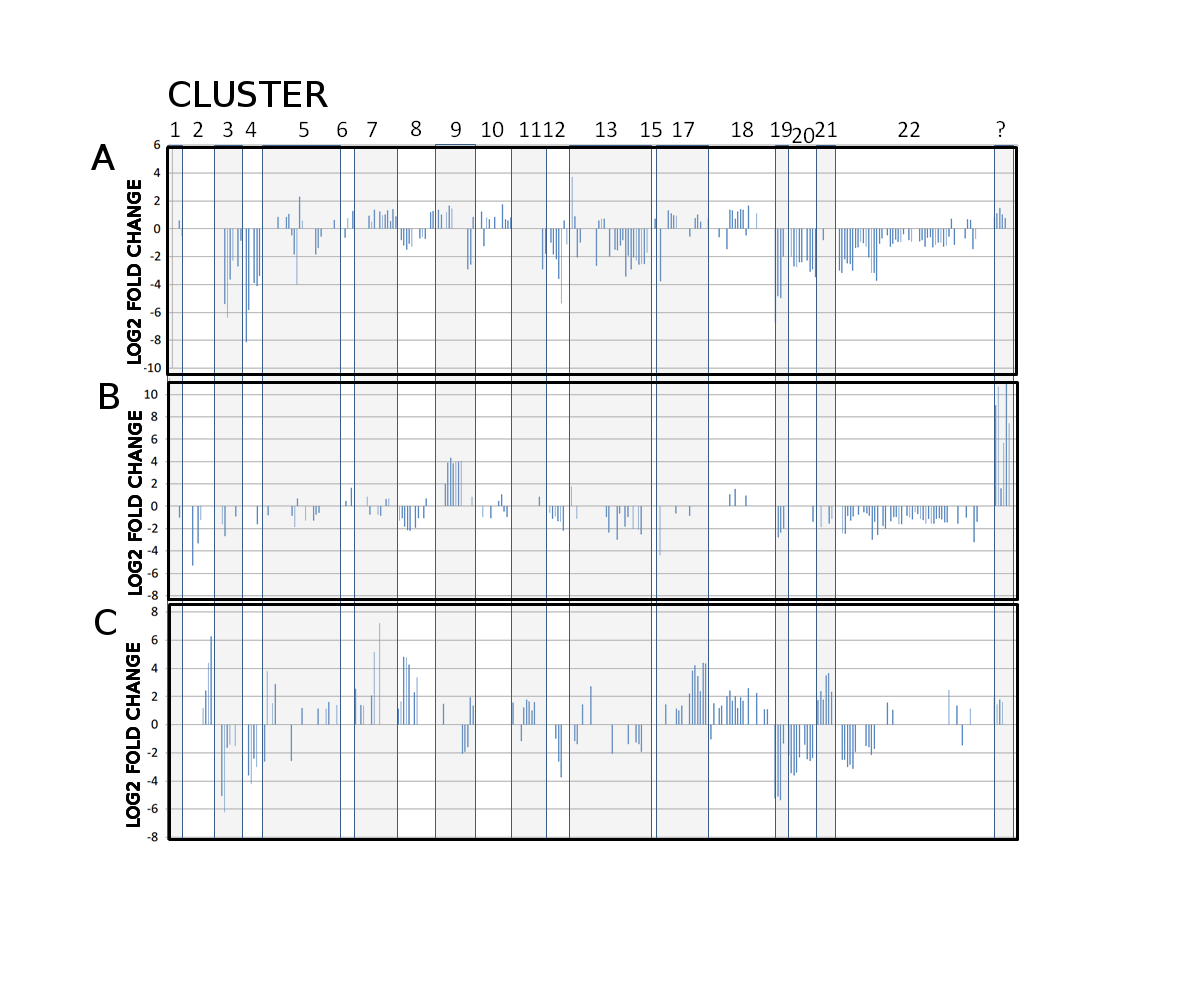

Supplement: S3 Fig — (DOCX) [file pone.0158724.s003.docx]
